# Supplementary material for: Interannual variability of summer surface mass balance and surface melting in the Amundsen sector, West Antarctica
Source: Copernicus journal article supplement (doi:10.5194/tc-14-229-2020), 2020-01-27
Supplement: Supplementary file [file tc-14-229-2020-supplement.pdf]

Supplement of The Cryosphere, 14, 229–249, 2020  
<https://doi.org/10.5194/tc-14-229-2020-supplement>  
© Author(s) 2020. This work is distributed under  
the Creative Commons Attribution 4.0 License.

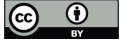

*Supplement of*

## **Interannual variability of summer surface mass balance and surface melting in the Amundsen sector, West Antarctica**

**Marion Donat-Magnin et al.**

*Correspondence to:* Marion Donat-Magnin ([marion.donatmagnin@gmail.com](mailto:marion.donatmagnin@gmail.com))

The copyright of individual parts of the supplement might differ from the CC BY 4.0 License.

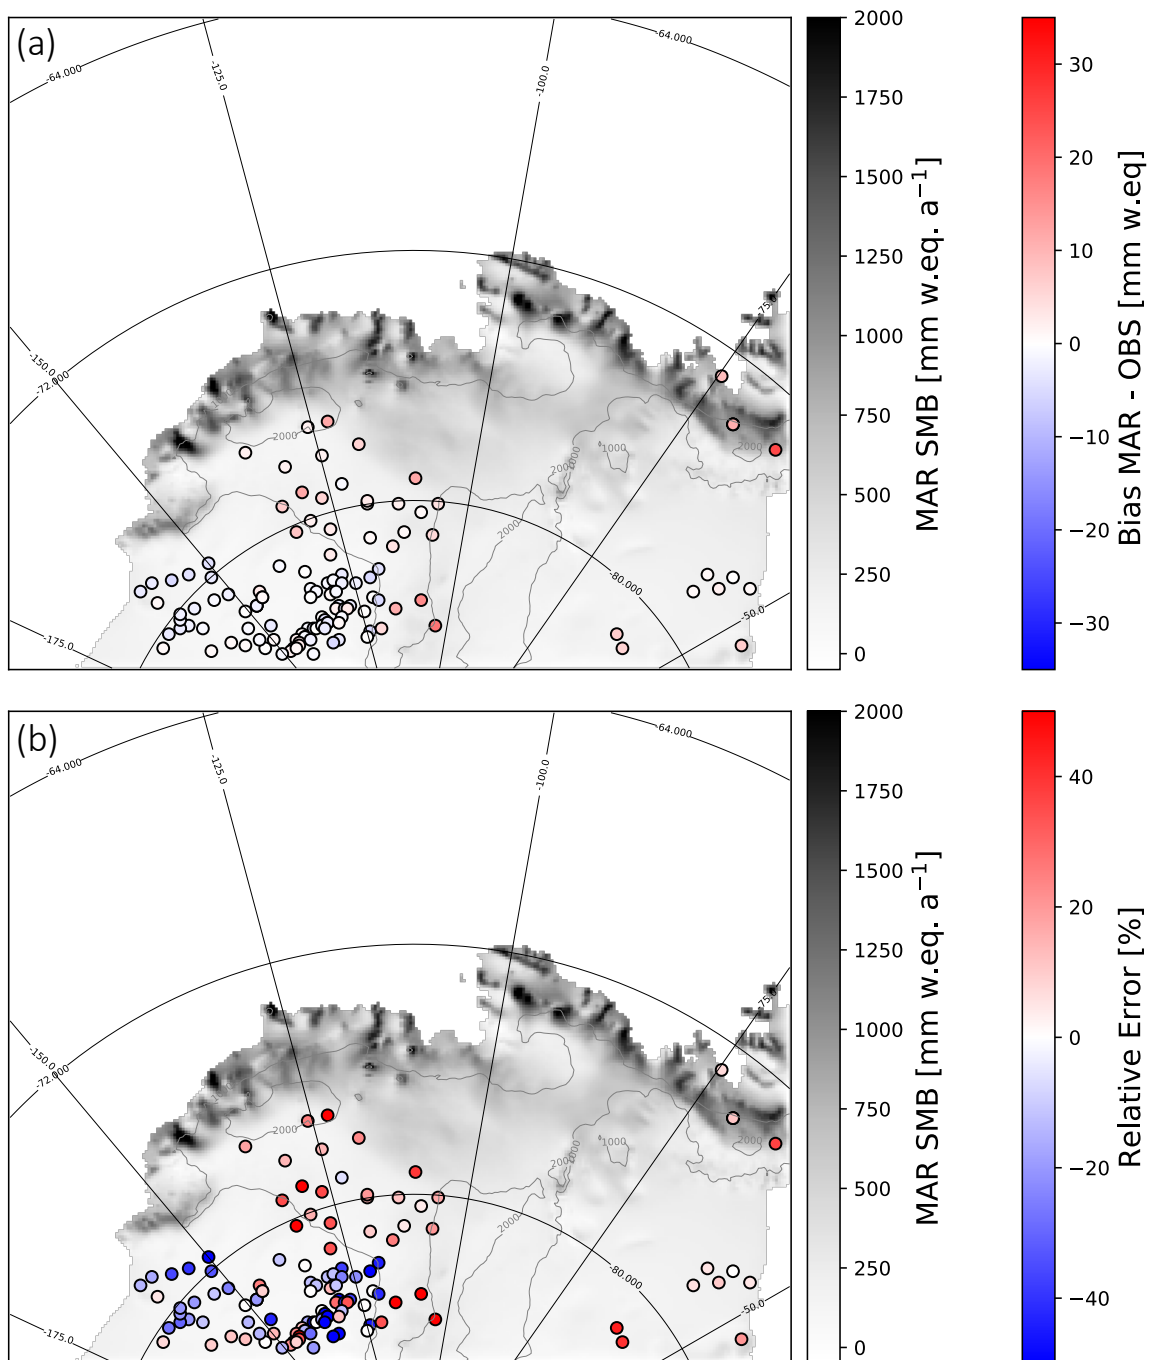

**Figure S1: Annual mean (1979-2017) simulated SMB (grey scale) and (a) bias between simulated SMB and SMB from GLACIOCLIM SAMBA dataset from Favier et al., (2013) updated by Wang et al., (2016) (blue-red color bar) ; (b) relative error of the simulated SMB compared to GLACIOCLIM SAMBA dataset (blue-red color bar). Grey contours indicate the surface height.**

**Table S1: Evaluation of daily near-surface wind speed for the selected AWS, including Root Mean Square Error (RMSE), correlation (R) and standard deviations ( $\sigma$ ).**

| Station name       | Bias (MAR-OBS) | Centered RMSE | R    | $\sigma_{MAR}/\sigma_{AWS}$ |
|--------------------|----------------|---------------|------|-----------------------------|
| 1 Brianna          | -0.17          | 1.84          | 0.87 | 0.97                        |
| 2 Byrd             | 0.09           | 1.77          | 0.86 | 0.89                        |
| 3 Cape Adams       | -0.09          | 1.70          | 0.62 | 0.94                        |
| 4 Doug             | 0.22           | 2.40          | 0.76 | 0.91                        |
| 5 Elizabeth        | 0.06           | 1.72          | 0.77 | 0.85                        |
| 6 Evans Knoll      | -0.56          | 2.28          | 0.82 | 0.87                        |
| 7 Harry            | 0.18           | 2.14          | 0.78 | 0.93                        |
| 8 Janet            | -0.33          | 1.69          | 0.89 | 0.89                        |
| 9 Kominko Slade    | 0.55           | 2.30          | 0.81 | 0.85                        |
| 10 Martha_2        | 2.02           | 1.72          | 0.77 | 0.99                        |
| 11 Martha I        | 1.22           | 1.92          | 0.65 | 0.92                        |
| 12 Mount McKibben  | -2.59          | 2.91          | 0.76 | 0.59                        |
| 13 Noel            | -1.82          | 3.87          | 0.79 | 0.53                        |
| 14 Patriot Hills   | 0.00           | 2.29          | 0.75 | 0.89                        |
| 15 Siple           | 0.11           | 1.81          | 0.82 | 0.82                        |
| 16 Ski Hills       | -1.11          | 2.46          | 0.86 | 0.70                        |
| 17 Swithinbank     | -0.91          | 1.73          | 0.88 | 0.93                        |
| 18 Theresa         | 1.69           | 2.07          | 0.86 | 1                           |
| 19 Backer Island   | -2.23          | 2.41          | 0.77 | 0.77                        |
| 20 Bean Peaks      | -0.07          | 2.71          | 0.71 | 0.61                        |
| 21 Bear Peninsula  | -0.52          | 3.68          | 0.63 | 0.88                        |
| 22 Clarke Mountain | -0.69          | 3.62          | 0.45 | 0.77                        |
| 23 Gomez Nunatak   | -3.18          | 2.62          | 0.82 | 0.58                        |
| 24 Haag Nunatak    | -3.00          | 2.66          | 0.80 | 0.58                        |
| 25 Howard Nunatak  | 0.85           | 2.55          | 0.77 | 1.2                         |
| 26 Inman Nunatak   | -1.40          | 2.98          | 0.80 | 0.68                        |
| 27 Kohler Glacier  | -0.95          | 1.92          | 0.65 | 0.94                        |
| 28 Lepley Nunatak  | -1.69          | 2.48          | 0.78 | 0.88                        |
| 29 Lower Thwaites  | -0.48          | 2.03          | 0.71 | 1.1                         |
| 30 Lyon Nunatak    | -1.34          | 2.14          | 0.74 | 0.76                        |
| 31 Mount Paterson  | -1.12          | 2.40          | 0.69 | 0.74                        |
| 32 Mount Sidley    | 2.99           | 3.96          | 0.61 | 1                           |
| 33 Mount Suggs     | -2.18          | 3.44          | 0.55 | 0.54                        |
| 34 Pirrot Hills    | -2.30          | 3.56          | 0.70 | 0.55                        |
| 35 Steward Hills   | -5.98          | 2.76          | 0.87 | 0.52                        |
| 36 Thurston Island | -1.32          | 2.56          | 0.74 | 0.68                        |
| 37 Toney Mountain  | -4.71          | 5.76          | 0.53 | 0.44                        |
| 38 Up Thwaites Gla | -0.39          | 2.02          | 0.73 | 0.83                        |
| 39 Whitmore Mounta | -3.08          | 3.69          | 0.72 | 0.45                        |
| 40 Wilson Nunatak  | -2.42          | 2.42          | 0.78 | 0.83                        |
| 41 Russkaya        | -4.32          | 7.68          | 0.54 | 0.54                        |

**Table S2: Evaluation of daily near-surface temperature for the selected AWS, including Root Mean Square Error (RMSE), correlation (R) and standard deviations ( $\sigma$ ).**

| Station name           | Bias (MAR-OBS) | Centered RMSE | R    | $\sigma_{\text{MAR}}/\sigma_{\text{AWS}}$ |
|------------------------|----------------|---------------|------|-------------------------------------------|
| 1 Brianna              | 0.18           | 2.83          | 0.96 | 0.94                                      |
| 2 Byrd                 | 1.31           | 3.95          | 0.93 | 0.87                                      |
| 3 Cape Adams           | 2.51           | 3.78          | 0.94 | 0.90                                      |
| 4 Doug                 | 0.94           | 3.04          | 0.94 | 0.89                                      |
| 5 Elizabeth            | -0.70          | 3.53          | 0.95 | 0.94                                      |
| 6 Evans_Knoll          | -0.29          | 3.54          | 0.92 | 1                                         |
| 7 Harry                | 1.08           | 2.87          | 0.96 | 0.91                                      |
| 8 Janet                | 1.06           | 3.62          | 0.92 | 0.97                                      |
| 9 Kominko Slade        | 1.15           | 4.08          | 0.92 | 0.86                                      |
| 10 Martha_2            | -0.22          | 4.18          | 0.96 | 0.94                                      |
| 11 Martha_I            | -1.61          | 4.26          | 0.95 | 0.96                                      |
| 12 Mount McKibben      | 0.34           | 2.66          | 0.95 | 1.1                                       |
| 13 Noel                | 0.94           | 4.49          | 0.86 | 0.82                                      |
| 14 Patriot_Hills       | -2.78          | 1.76          | 0.97 | 0.96                                      |
| 15 Siple               | 2.12           | 3.45          | 0.93 | 0.88                                      |
| 16 Ski_Hills           | 0.83           | 3.15          | 0.94 | 0.92                                      |
| 17 Swithinbank         | -0.92          | 3.04          | 0.95 | 0.92                                      |
| 18 Theresa             | -1.47          | 2.73          | 0.94 | 0.87                                      |
| 19 Backer_Island       | -1.53          | 3.37          | 0.94 | 1.1                                       |
| 20 Bean_Peaks          | -0.12          | 2.88          | 0.95 | 0.93                                      |
| 21 Bear_Peninsula      | -0.06          | 2.6           | 0.94 | 1                                         |
| 22 Clarke_Mountain     | -2.81          | 3.39          | 0.94 | 1.2                                       |
| 23 Gomez_Nunatak       | -0.34          | 2.29          | 0.93 | 0.97                                      |
| 24 Haag_Nunatak        | 0.04           | 2.74          | 0.95 | 0.95                                      |
| 25 Howard_Nunatak      | -0.09          | 2.86          | 0.92 | 0.93                                      |
| 26 Inman_Nunatak       | 0.38           | 2.86          | 0.93 | 1                                         |
| 27 Kohler_Glacier      | 0.89           | 3.56          | 0.91 | 0.93                                      |
| 28 Lepley_Nunatak      | 0.52           | 3.06          | 0.91 | 0.97                                      |
| 29 Lower_Thwaites      | 1.32           | 4.10          | 0.90 | 0.87                                      |
| 30 Lyon_Nunatak        | 0.88           | 3.46          | 0.90 | 1                                         |
| 31 Mount_Paterson      | -2.82          | 2.84          | 0.95 | 1.1                                       |
| 32 Mount_Sidley        | -2.27          | 2.85          | 0.91 | 1                                         |
| 33 Mount_Suggs         | -1.03          | 3.99          | 0.90 | 1                                         |
| 34 Pirrot_Hills        | -1.97          | 2.79          | 0.94 | 0.95                                      |
| 35 Steward_Hills       | -0.42          | 2.13          | 0.97 | 0.95                                      |
| 36 Thurston_Island     | -0.28          | 3.35          | 0.89 | 0.98                                      |
| 37 Toney_Mountain      | 0.72           | 3.16          | 0.91 | 0.96                                      |
| 38 Up_Thwaites_Glacier | 1.31           | 4.75          | 0.88 | 0.88                                      |
| 39 Whitmore_Mounta     | -0.69          | 3.01          | 0.92 | 1.1                                       |
| 40 Wilson_Nunatak      | 1.10           | 1.90          | 0.98 | 0.90                                      |
| 41 Russkaya            | 0.47           | 4.15          | 0.87 | 0.87                                      |

**Table S3: Correlation R between -SOI, SAM, and ASL indices and the SMB over individual drainage basins in austral fall (MAM), winter (JJA), and Spring (SON). The statistical significance (t-test) is written within brackets.**

| Drainage Basins    | Season | -SOI vs SMB | SAM vs SMB  | ASL longitudinal location vs SMB | ASL relative central pressure vs SMB |
|--------------------|--------|-------------|-------------|----------------------------------|--------------------------------------|
| <b>Abbot</b>       | MAM    | 0.26 (89%)  | 0.20 (78%)  | 0.09 (43%)                       | 0.17 (70%)                           |
|                    | JJA    | -0.32 (95%) | 0.37 (98%)  | 0.03 (16%)                       | 0.06 (30%)                           |
|                    | SON    | -0.19 (99%) | 0.40 (99%)  | 0.10 (47%)                       | -0.02 (7%)                           |
| <b>Cosgrove</b>    | MAM    | 0.46 (100%) | -0.02 (8%)  | 0.09 (40%)                       | 0.26 (89%)                           |
|                    | JJA    | -0.16 (66%) | 0.16 (68%)  | 0.11 (51%)                       | 0.02 (13%)                           |
|                    | SON    | -0.03 (13%) | 0.28 (91%)  | 0.12 (52%)                       | 0.04 (21%)                           |
| <b>Pine Island</b> | MAM    | 0.44 (100%) | -0.02 (9%)  | 0.12 (53%)                       | 0.24 (85%)                           |
|                    | JJA    | -0.24 (85%) | 0.26 (89%)  | 0.03 (15%)                       | 0.07 (33%)                           |
|                    | SON    | -0.03 (15%) | 0.27 (90%)  | 0.08 (35%)                       | -0.01 (5%)                           |
| <b>Thwaites</b>    | MAM    | 0.27 (90%)  | -0.18 (72%) | 0.24 (85%)                       | 0.16 (68%)                           |
|                    | JJA    | -0.22 (83%) | 0.09 (42%)  | 0.02 (9%)                        | 0.13 (55%)                           |
|                    | SON    | -0.09 (40%) | 0.18 (73%)  | 0.12 (53%)                       | -0.02 (9%)                           |
| <b>Dotson</b>      | MAM    | 0.15 (64%)  | -0.22 (83%) | 0.22 (82%)                       | 0.12 (52%)                           |
|                    | JJA    | 0.00 (2%)   | -0.01 (3%)  | -0.01 (6%)                       | 0.09 (40%)                           |
|                    | SON    | -0.10 (46%) | -0.01 (4%)  | 0.15 (64%)                       | -0.04 (17%)                          |
| <b>Crosson</b>     | MAM    | 0.21 (81%)  | -0.16 (68%) | 0.22 (82%)                       | 0.15 (63%)                           |
|                    | JJA    | -0.13 (55%) | 0.06 (27%)  | -0.02 (11%)                      | 0.13 (56%)                           |
|                    | SON    | -0.09 (41%) | 0.04 (17%)  | 0.15 (65%)                       | -0.04 (19%)                          |
| <b>Getz</b>        | MAM    | 0.24 (85%)  | -0.48 (99%) | 0.20 (79%)                       | 0.08 (37%)                           |
|                    | JJA    | 0.21 (80%)  | -0.29 (93%) | 0.08 (36%)                       | 0.01 (7%)                            |
|                    | SON    | 0.27 (90%)  | -0.29 (93%) | 0.08 (37%)                       | 0.15 (62%)                           |

**Table S4: Composite dates for surface melt and surface mass balance define as dates where value, averaged over Thwaites and Pine Island basins, is lower than the percentile 15<sup>th</sup> (composite -) or higher than percentile 85<sup>th</sup> (composite +).**

| Melt + | Melt - | SMB + | SMB - |
|--------|--------|-------|-------|
| 1982   | 1994   | 1993  | 1980  |
| 1985   | 2001   | 1998  | 1989  |
| 1988   | 2002   | 2013  | 2001  |
| 1993   | 2004   | 2015  | 2005  |
| 1998   | 2009   | 2016  | 2009  |
| 2013   | 2011   | 2017  | 2011  |

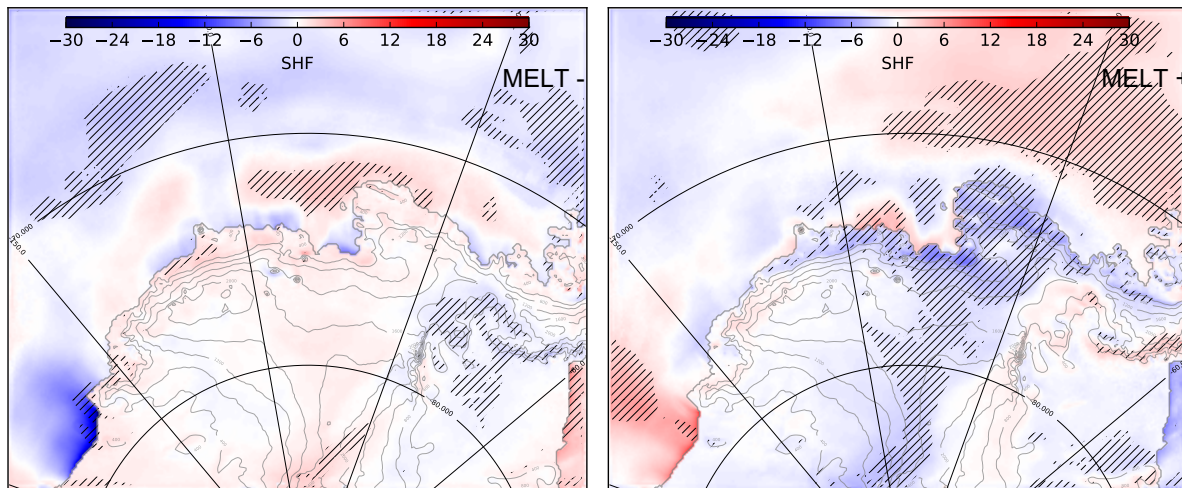

**Figure S2: Sensible heat flux anomalies ( $\text{W}\cdot\text{m}^{-2}$ ) during low summer surface melt (left) and high summer surface melt (right), positive toward the surface. Anomalies are calculated as high/low composites minus the climatology over 1979-2017. Hatched area represents significance >90% calculated with a *t*-test.**

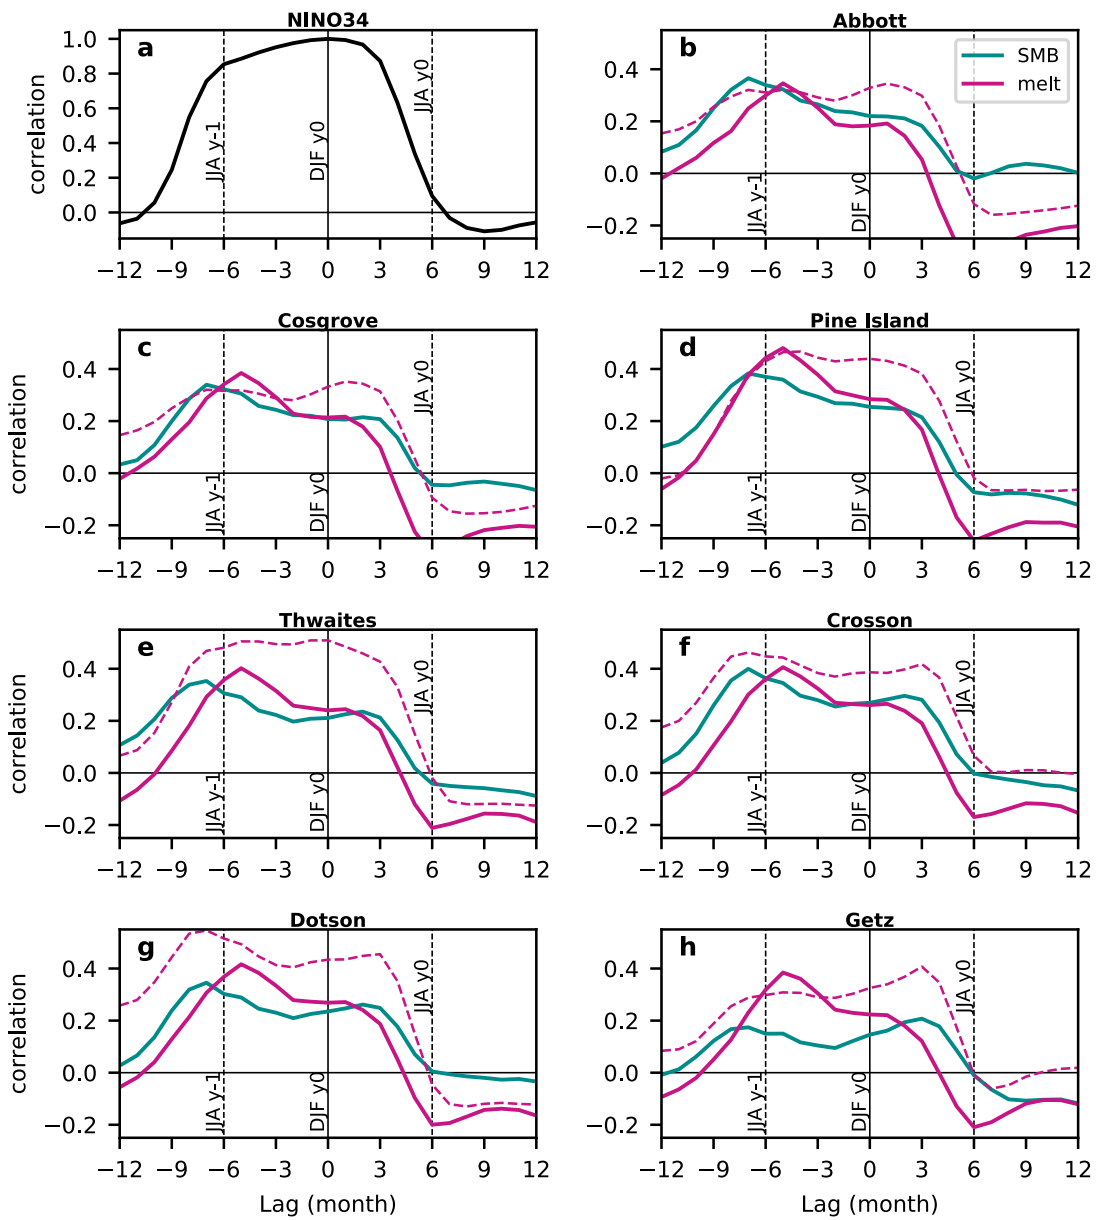

**Figure S3: Correlation between lagged 3-month averaged NINO3.4 (i.e. DJF at zero lag, previous JJA at -6 lag) and (a) DJF NINO3.4, (b-h) simulated SMB and melt rates in individual drainage basins. The dashed curves correspond to the number of melt days derived from satellite data by Picard et al. (2007).**
